# Supplementary material for: Differential Association of Glycation Products with Bone Mineral Density and Fat Mass in Healthy and Diabetes Type 2 Subjects from Mexican Southeastern: A Cross Sectional Study
Source: MDPI journal article supplement (doi:10.3390/medicina59081451), 2023-08-11
Supplement: s1 [file s1]

**Table S2.** ALB-g, HbA1c, and PTD correlations in DM (n=66) and noDM (n=74) women.

|                          |             | DM2    |       | noDM   |       | DM2    |       | noDM   |       | DM2    |       | noDM   |       |
|--------------------------|-------------|--------|-------|--------|-------|--------|-------|--------|-------|--------|-------|--------|-------|
|                          |             | PTD    |       |        |       | ALB-g  |       |        |       | HbA1c  |       |        |       |
|                          |             | r      | p     | r      | p     | r      | p     | r      | p     | r      | p     | r      | p     |
| BMD (g/cm <sup>2</sup> ) | Total       | -0.367 | 0.042 | 0.291  | 0.141 | -0.249 | 0.177 | 0.079  | 0.691 | -0.317 | 0.083 | 0.193  | 0.326 |
|                          | Arms        | -0.389 | 0.031 | 0.294  | 0.137 | -0.181 | 0.330 | 0.156  | 0.427 | -0.514 | 0.003 | 0.264  | 0.175 |
|                          | Ribs        | -0.452 | 0.011 | 0.234  | 0.240 | -0.297 | 0.104 | 0.201  | 0.304 | -0.204 | 0.272 | 0.353  | 0.066 |
|                          | Spine       | -0.475 | 0.007 | 0.208  | 0.298 | -0.18  | 0.332 | -0.145 | 0.463 | -0.186 | 0.317 | -0.266 | 0.172 |
|                          | Pelvis      | -0.511 | 0.003 | 0.223  | 0.263 | -0.119 | 0.524 | 0.197  | 0.314 | 0.204  | 0.272 | -0.15  | 0.446 |
|                          | Legs        | -0.462 | 0.009 | 0.348  | 0.075 | -0.230 | 0.213 | 0.244  | 0.211 | -0.353 | 0.051 | 0.056  | 0.777 |
| BMC (g)                  | Total       | -0.461 | 0.009 | 0.282  | 0.155 | -0.434 | 0.015 | 0.053  | 0.787 | -0.428 | 0.016 | 0.018  | 0.927 |
|                          | Arms        | -0.424 | 0.017 | 0.243  | 0.222 | -0.372 | 0.039 | 0.230  | 0.239 | -0.476 | 0.007 | -0.098 | 0.621 |
|                          | Ribs        | -0.457 | 0.010 | 0.313  | 0.111 | -0.12  | 0.520 | 0.158  | 0.421 | -0.21  | 0.258 | 0.336  | 0.081 |
|                          | Spine       | -0.601 | 0.001 | -0.054 | 0.790 | -0.278 | 0.130 | -0.181 | 0.356 | -0.194 | 0.295 | -0.289 | 0.136 |
|                          | Pelvis      | -0.418 | 0.019 | 0.239  | 0.229 | -0.234 | 0.205 | 0.156  | 0.427 | -0.207 | 0.265 | -0.203 | 0.299 |
|                          | Legs        | -0.522 | 0.003 | 0.343  | 0.080 | -0.341 | 0.061 | 0.244  | 0.210 | -0.444 | 0.012 | -0.081 | 0.681 |
| Fat mass (g))            | Total       | -0.404 | 0.024 | 0.083  | 0.680 | -0.103 | 0.580 | -0.276 | 0.155 | 0.290  | 0.113 | -0.070 | 0.725 |
|                          | Arms        | -0.207 | 0.264 | 0.104  | 0.606 | -0.046 | 0.808 | -0.135 | 0.494 | 0.254  | 0.168 | -0.09  | 0.648 |
|                          | Trunk       | -0.513 | 0.003 | 0.084  | 0.676 | -0.178 | 0.337 | -0.321 | 0.096 | 0.246  | 0.182 | -0.169 | 0.390 |
|                          | Legs        | -0.371 | 0.040 | 0.087  | 0.665 | -0.185 | 0.319 | -0.170 | 0.388 | 0.351  | 0.053 | -0.113 | 0.568 |
| Fat mass (%)             | Total       | -0.232 | 0.209 | -0.029 | 0.887 | -0.203 | 0.273 | -0.089 | 0.653 | 0.447  | 0.012 | -0.348 | 0.069 |
|                          | Arms        | -0.080 | 0.670 | -0.091 | 0.652 | -0.183 | 0.325 | -0.065 | 0.742 | 0.386  | 0.032 | -0.215 | 0.271 |
|                          | Trunk       | -0.255 | 0.165 | -0.022 | 0.913 | -0.158 | 0.396 | -0.062 | 0.753 | 0.381  | 0.035 | -0.473 | 0.051 |
|                          | Legs        | -0.234 | 0.205 | -0.241 | 0.225 | -0.196 | 0.291 | -0.099 | 0.616 | 0.540  | 0.002 | -0.226 | 0.248 |
| Anthropometry<br>Indexes | BMI         | -0.403 | 0.025 | 0.027  | 0.894 | -0.033 | 0.861 | -0.247 | 0.206 | 0.285  | 0.121 | 0.128  | 0.517 |
|                          | W/Ht        | -0.374 | 0.038 | 0.124  | 0.538 | 0.009  | 0.963 | -0.076 | 0.702 | 0.299  | 0.102 | 0.271  | 0.164 |
|                          | RFM         | -0.272 | 0.138 | -0.231 | 0.247 | -0.059 | 0.753 | -0.267 | 0.170 | 0.331  | 0.069 | -0.066 | 0.739 |
|                          | W/H         | -0.279 | 0.129 | 0.377  | 0.052 | 0.228  | 0.218 | 0.137  | 0.488 | 0.170  | 0.360 | 0.371  | 0.052 |
|                          | Waist girth | -0.483 | 0.006 | 0.218  | 0.274 | -0.122 | 0.513 | -0.098 | 0.62  | 0.096  | 0.609 | 0.196  | 0.317 |
|                          | Hip girth   | -0.364 | 0.044 | -0.031 | 0.877 | -0.173 | 0.353 | -0.373 | 0.051 | 0.099  | 0.596 | -0.094 | 0.633 |
|                          | Neck girth  | -0.429 | 0.016 | 0.174  | 0.387 | -0.088 | 0.639 | -0.37  | 0.053 | 0.004  | 0.982 | -0.141 | 0.473 |

DM2= Diabetes mellitus 2, noDM=No diabetes mellitus, PTD=Pentosidine, ALB-g= glycated Albumin, HbA1c= glycated hemoglobin, BMD= Bone mineral density, BMC=Bone mineral content, RFM= Relative fat mass, BMI= Body mass index, W/H= Waist-to-Hip ratio, W/Ht= Waist-to-height ratio.
