# Supplementary material for: Differential Association of Glycation Products with Bone Mineral Density and Fat Mass in Healthy and Diabetes Type 2 Subjects from Mexican Southeastern: A Cross Sectional Study
Source: MDPI journal article supplement (doi:10.3390/medicina59081451), 2023-08-11
Supplement: s1 [file s1]

**Table S1.** Correlation coefficients for PTD and HbA1c in DM2 men (n=46).

| PTD |       |       | HbA1c                |        |       |
|-----|-------|-------|----------------------|--------|-------|
|     | r     | p     |                      | r      | p     |
| RFM | 0.482 | 0.037 | BMC Arms             | -0.505 | 0.027 |
| BMI | 0.525 | 0.021 | BMD Pelvis           | -0.525 | 0.021 |
|     |       |       | Fat mass Legs<br>(g) | 0.464  | 0.045 |

PTD=Pentosidine, HbA1c= glycated hemoglobin, RFM= Relative fat mass, BMI= Body mass index, BMD= Bone mineral density, BMC=Bone mineral content.
