# Supplementary material for: Differential Association of Glycation Products with Bone Mineral Density and Fat Mass in Healthy and Diabetes Type 2 Subjects from Mexican Southeastern: A Cross Sectional Study
Source: MDPI journal article supplement (doi:10.3390/medicina59081451), 2023-08-11
Supplement: s1 [file s1]

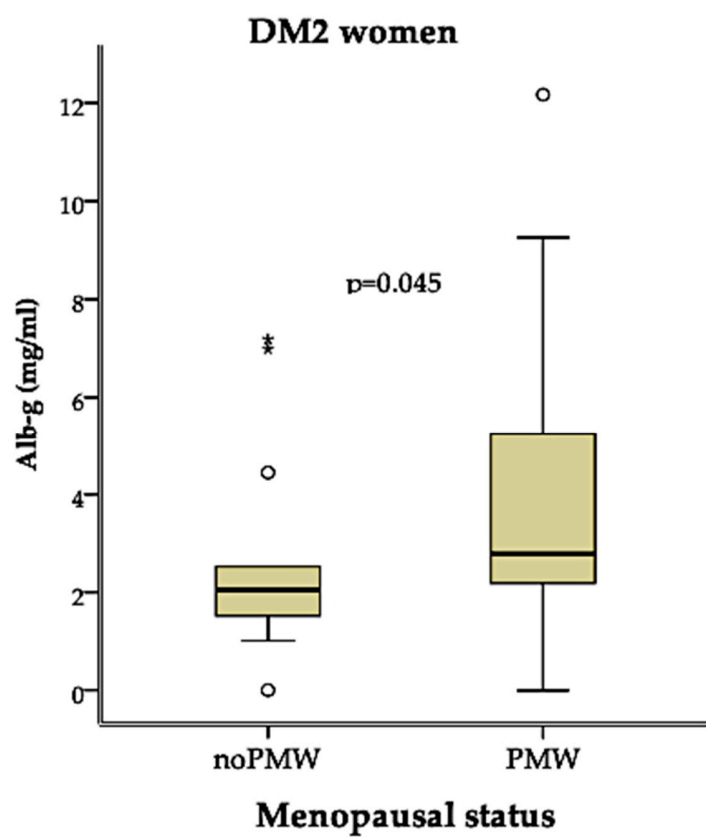

Figure S1. Comparison of serum ALB-g levels in DM2 women, by PMW and noPMW categories (ALB-g= glycated albumin, DM2=Diabetes mellitus 2, PMW= Postmenopausal women, noPMW=Non-postmenopausal women)
